# Supplementary material
Source: PubMed Central journal article supplement (PMC5909884)
Supplement: blood805895-suppl1.pdf [file blood805895-suppl1.pdf]

**Pevonedistat, a first-in-class NEDD8-activating enzyme (NAE) inhibitor, combined with azacitidine, in patients with AML**

**Supplemental information**

Ronan T. Swords,\* Steven Coutre, Michael B. Maris, Joshua F. Zeidner, James M. Foran, Jose Cruz, Harry P. Erba, Jesus G. Berdeja, Wayne Tam, Saran Vardhanabhuti, Iwona Pawlikowska- Dobler, H el ene M. Faessel, Ajeeta B. Dash, Farhad Sedarati, Bruce J. Dezube, Douglas V. Faller, and Michael R. Savona\*

\*Corresponding authors

**Supplemental table 1A and 1B**

**Supplemental table 2**

**Supplemental table 3**

**Supplemental figure 1**

**Supplemental figure 2**

**Supplemental figure 3**

**Supplemental information**

**Supplemental table 1A. List of 116 genes included in the targeted NGS panel**

|       |        |       |        |         |         |           |          |                      |        |
|-------|--------|-------|--------|---------|---------|-----------|----------|----------------------|--------|
| PHF6  | CARD11 | FGFR2 | JAK2   | NRAS    | SOCS1   | CIITA     | P2RY8    | UNC5D                | PSMB10 |
| MLL   | CBL    | FGFR3 | JAK3   | PAX5    | TET2    | ETV6      | PASD1    | XPO1                 | PSMB5  |
| APC   | CDKN2A | FLT3  | KDM6A  | PDGFRA  | TNFAIP3 | GNA13     | PCLO     | CCND1                | PSMB6  |
| EGFR  | CEBPA  | GATA1 | KIT    | PIK3CA  | TP53    | HIST1H1C  | PIM1     | ERN1                 | PSMB8  |
| MET   | CREBBP | GATA2 | KRAS   | PRDM1   | WT1     | HIST1H3B  | POU2F2   | MAP3K7<br>(TAK1)     | PSMB9  |
| STK11 | CRLF2  | GNAS  | MPL    | PTEN    | ACTB    | HLA-A     | SOCS1    | TNFRSF11<br>A (RANK) | TRAF3  |
| ABL1  | CSF1R  | HRAS  | MT-ND4 | PTPN11  | B2M     | KRTAP5-5  | STAT3    | TRAF2                | AKT2   |
| AKT1  | CTNNB1 | IDH1  | MYD88  | RB1     | BTG1    | LOC153328 | SYK      | TRAF5                | FGFR1  |
| ASXL1 | DNMT3A | IDH2  | NF1    | RUNX1   | CCND3   | MEF2B     | SYN2     | XBP1                 |        |
| ATM   | EP300  | IKZF1 | NOTCH1 | SF3B1   | CD58    | MLL2      | TMSL3    | IKBa                 |        |
| ATRX  | EZH2   | IL7R  | NOTCH2 | SMAD4   | CD70    | NFKBIA    | TNFRSF14 | NFKB2                |        |
| BRAF  | FBXW7  | JAK1  | NPM1   | SMARCB1 | CD79B   | OR6K3     | UBE2A    | PSMB1                |        |

**Supplemental table 1B. List of 38 frequently mutated genes with mutations identified using the targeted NGS panel**

| <b>Gene</b> | <b>Amino acid ranges*</b>                       | <b>Truncating ranges*</b> |
|-------------|-------------------------------------------------|---------------------------|
| ASXL1       | None                                            | 327-1540                  |
| DNMT3A      | 290-374;626-910                                 | All                       |
| EZH2        | 1-340;428-476;502-611;617-738;                  | All                       |
| GATA1       | ExACFreq<0.01                                   | All                       |
| GNAS        | 844-844;201-201                                 | None                      |
| IDH1        | 126-138                                         | None                      |
| IDH2        | 134-146;164-180                                 | None                      |
| IKZF1       | 142-196                                         | All                       |
| JAK2        | 505-547;617-617;683-683;867-867;873-873;933-933 | None                      |
| KRAS        | ExACFreq<0.01                                   | None                      |
| MPL         | 500-520                                         | None                      |
| NOTCH1      | 1530-1795;                                      | 2061-2555                 |
| NPM1        | None                                            | All                       |
| NRAS        | ExACFreq<0.01                                   | None                      |
| PHF6        | 197-353;                                        | All                       |
| RUNX1       | ExACFreq<0.01                                   | All                       |
| SF3B1       | 600-780;                                        | None                      |
| TET2        | 1104-1481;1843-2002;                            | All                       |
| TP53        | ExACFreq<0.01                                   | All                       |

\*The accepted amino acid changes and truncating ranges used for mutation calling from NGS sequence data in frequently-mutated genes. 'None' indicates that no amino acid changes or truncating mutations are accepted. 'ExAcFreq<0.01' indicates that all mutations are accepted if the allele is present in less than 1% of the ExAC population. 'All' indicates that all of the truncating mutations are accepted.

**Supplemental table 2: Response based on treatment cycles**

| <b>Number of cycles treated with AZA+PEV</b> | <b>Responses observed at Cycle 1</b> | <b>Responses observed at Cycle 2</b> | <b>Responses observed at Cycle 4</b> | <b>Responses observed at Cycle 7</b> | <b>Total pts with objective responses</b> | <b>Patients</b> |
|----------------------------------------------|--------------------------------------|--------------------------------------|--------------------------------------|--------------------------------------|-------------------------------------------|-----------------|
| <6 cycles                                    | 7                                    | 45                                   | 1                                    | 0                                    | 13                                        | 41              |
| ≥6 cycles                                    | 6                                    | 2                                    | 8                                    | 3                                    | 19                                        | 23              |
| Total                                        | 13                                   | 7                                    | 9                                    | 3                                    | 32                                        | 64              |

**Supplemental table 3. Baseline characteristics for de novo AML versus secondary AML**

| <b>Characteristics</b>            | <b>De novo AML<br/>(n = 36)</b> | <b>Secondary AML<br/>(n = 28)</b> |
|-----------------------------------|---------------------------------|-----------------------------------|
| Median age, years (range)         | 77 (66–89)                      | 73 (61–84)                        |
| Median haemoglobin, g/dL (range)† | 9.8 (8.2–12.4)                  | 10.5 (7.3–12.4)                   |
| ECOG PS, n (%)                    |                                 |                                   |
| 0                                 | 12 (33)                         | 15 (54)                           |
| 1                                 | 16 (44)                         | 7 (25)                            |
| 2                                 | 8 (22)                          | 6 (21)                            |
| Cytogenetics, n (%)               |                                 |                                   |
| Adverse                           | 13 (36)                         | 5 (18)                            |
| Intermediate                      | 17 (47)                         | 15 (54)                           |
| Favorable                         | 1 (3)                           | 1 (4)                             |
| Unclassified                      | 4 (11)                          | 5 (18)                            |
| Not available                     | 1 (3)                           | 2 (7)                             |

†p=0.01; all other categories p= >0.05.

Supplemental figure 1. Study CONSORT diagram and patient disposition

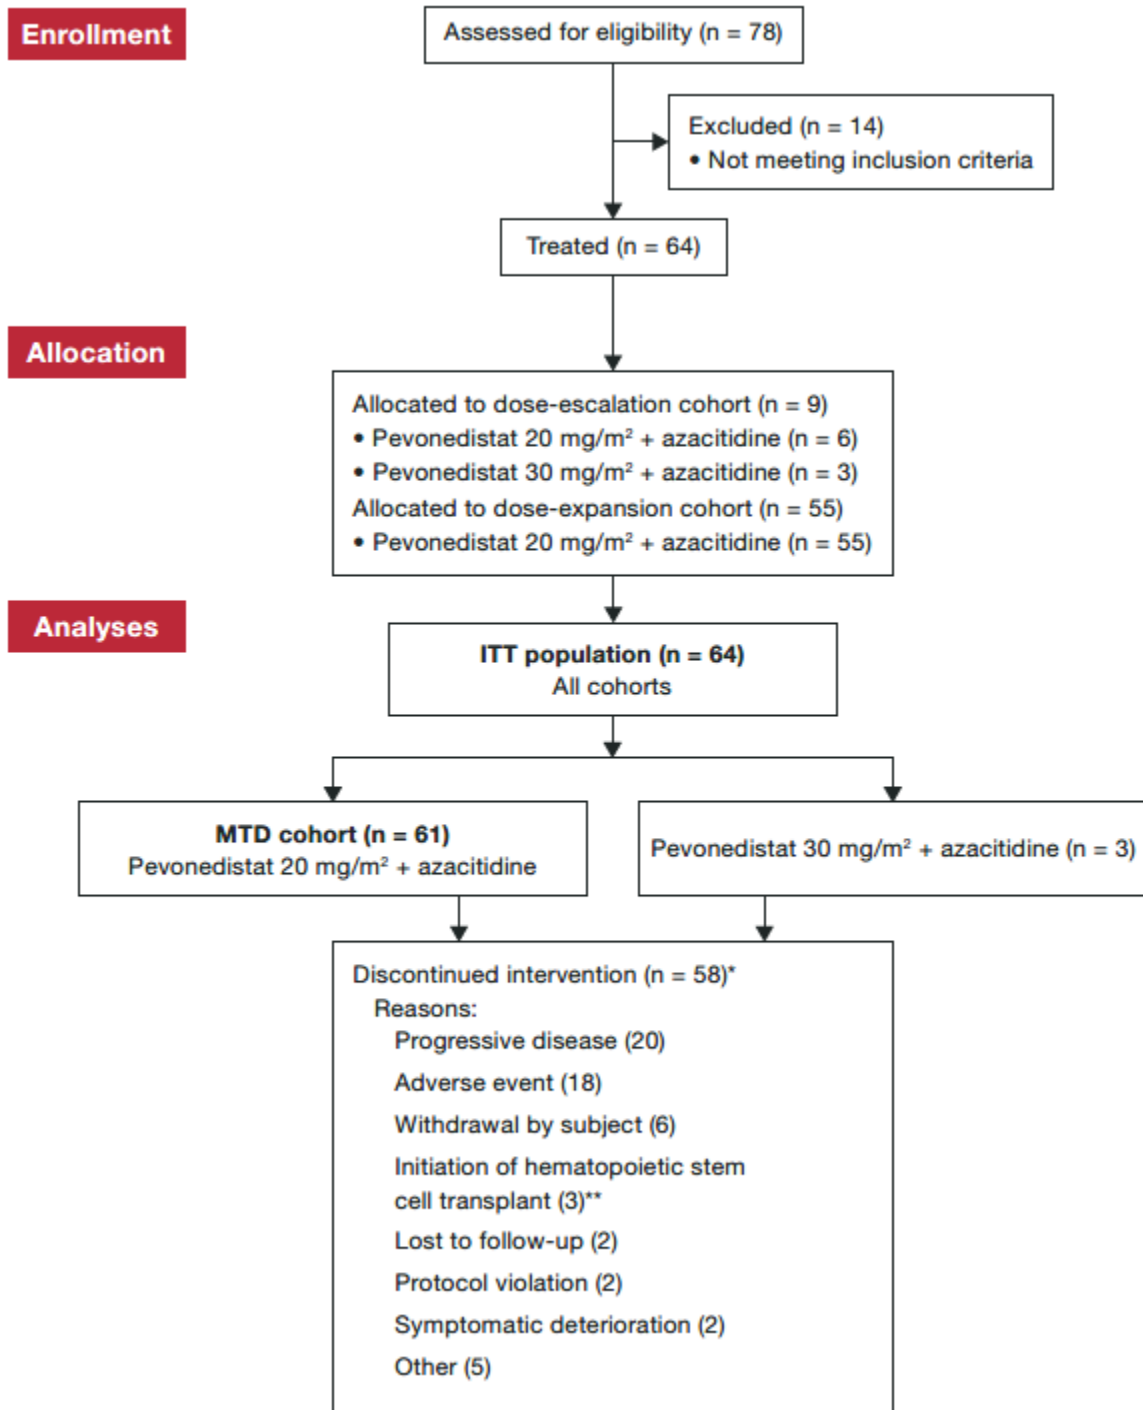

\* At the time of submission of manuscript, 6 patients remained active on study

\*\*Three patients received HSCT: one patient had secondary AML and achieve CRi at treatment cycle 6 prior to HSCT; another patient had de novo AML and achieved CR at treatment cycle 4 prior to transitioning into HSCT; the third patient with de novo AML had achieved SD at treatment cycle 4 prior to HSCT

**Supplemental figure 2. Kaplan-Meier survival analysis based on best response achieved in the MTD cohort**

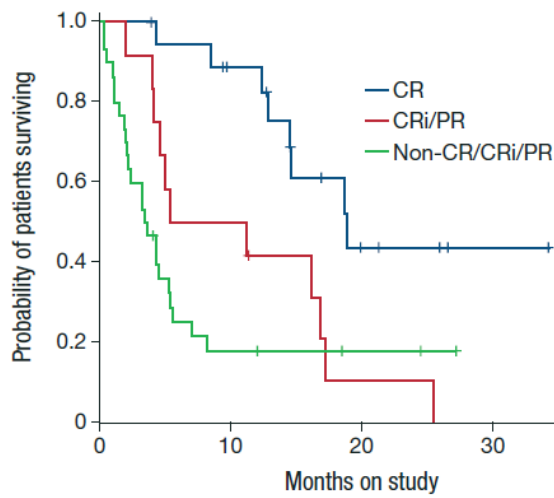

Number of patients at risk:

|               |    |    |    |   |   |   |   |
|---------------|----|----|----|---|---|---|---|
| CR            | 19 | 17 | 14 | 8 | 4 | 3 | 1 |
| CRi/PR        | 12 | 7  | 6  | 4 | 1 | 1 | 0 |
| Non-CR/CRi/PR | 30 | 10 | 5  | 3 | 2 | 1 | 0 |

N=61, log-rank p-value <0.05. Median overall survival for CR group: 18.8 months (95%CI: 13.0, NE); median overall survival for CRi/PR group: 8.3 months (95% CI: 4.0, 17.0)

**Supplemental figure 3. Heatmap showing mutational status of all 46 mutated genes and response data for patients in the MTD cohort**

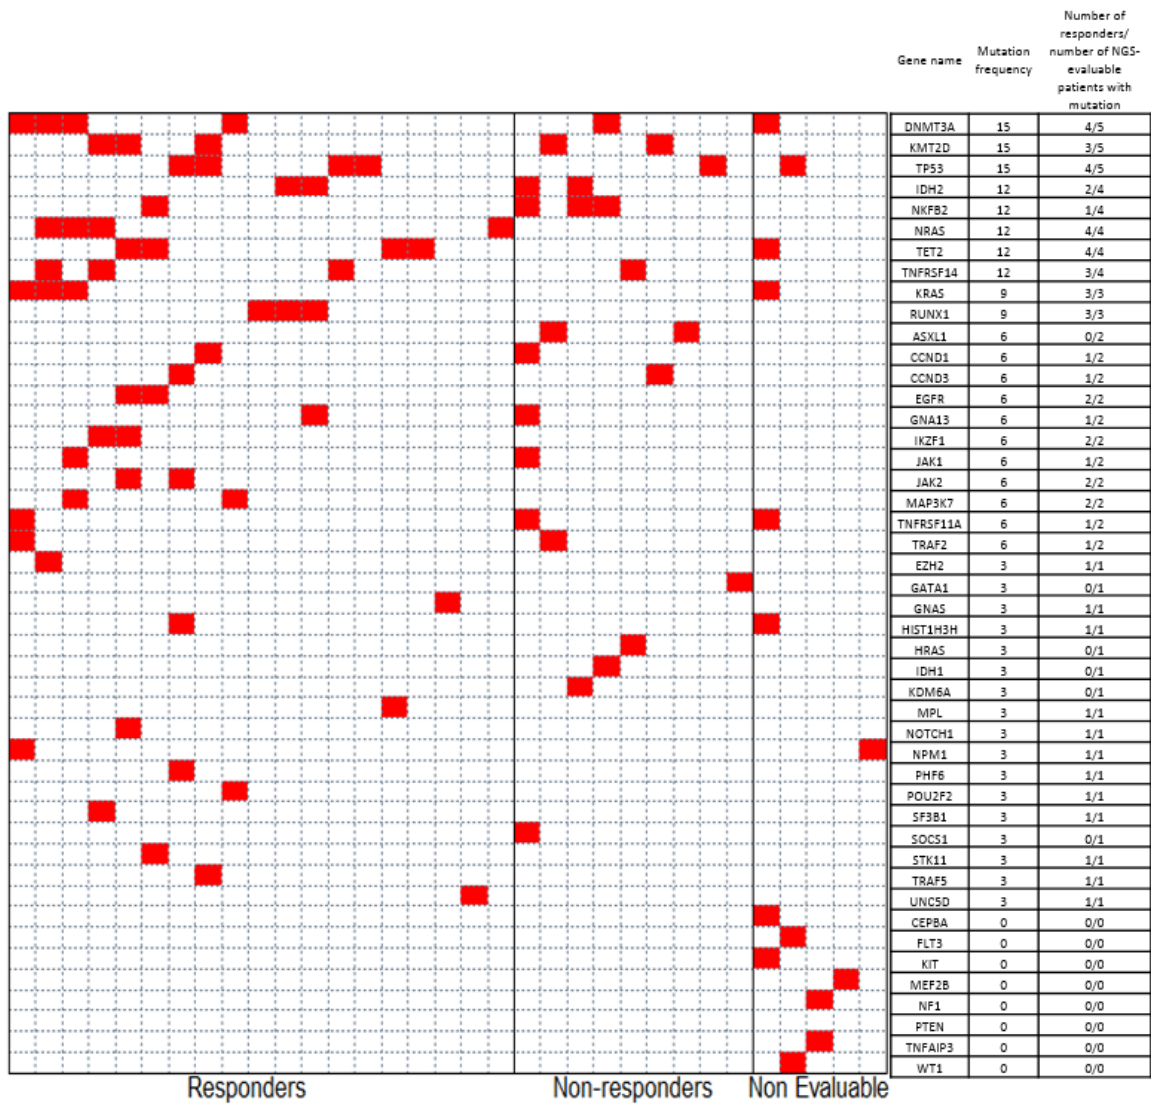

Genetic mutation data identified by targeted NGS for all 46 genes that were found to be mutated in the 33 patients in MTD cohort are shown. Each column represents a single patient, and each row represents a single gene. Presence of a mutation in any gene is denoted as a red box in red.

\*Mutation frequency = (# of patients with mutation/ # of NGS-evaluable patients) \* 100.

^Responders = CR + CRi + PR.
